# Supplementary material for: 4-Iodo-1H-imidazole dramatically improves the open-circuit voltages of perovskite solar cells to 1.2 V
Source: Royal Society of Chemistry journal article supplement (doi:10.1039/d3nj01146a), 2023-01-01
Supplement: d3nj01146a1.pdf [file d3nj01146a1.pdf]

## Supporting Information for

### 4-Iodo-1H-imidazole Dramatically Improving the Open-circuit Voltages of Perovskite Solar Cell Exceeding 1.2 V

Jinbiao Jia <sup>a\*</sup>, Beibei Shi <sup>a</sup>, Jia Dong <sup>a</sup>, Zhe Jiang <sup>a</sup>, Shuaibing Guo <sup>a</sup>, Jihuai Wu <sup>b</sup>, Bingqiang Cao <sup>c\*</sup>

<sup>a</sup>School of Physics and Physical Engineering, Shandong Provincial Key Laboratory of Laser Polarization and Information Technology, Qufu Normal University, Qufu 273165, China

<sup>b</sup>Engineering Research Center of Environment-Friendly Functional Materials for Ministry of Education, Fujian Key Laboratory of Photoelectric Functional Materials, Institute of Materials Physical Chemistry, Huaqiao University, Xiamen, 361021, China

<sup>c</sup>School of Materials Science and Engineering, University of Jinan, Jinan 250022, China

\* Corresponding authors: E-mail: [jinbiaojia@qfnu.edu.cn](mailto:jinbiaojia@qfnu.edu.cn); [mse\\_caobq@ujn.edu.cn](mailto:mse_caobq@ujn.edu.cn)

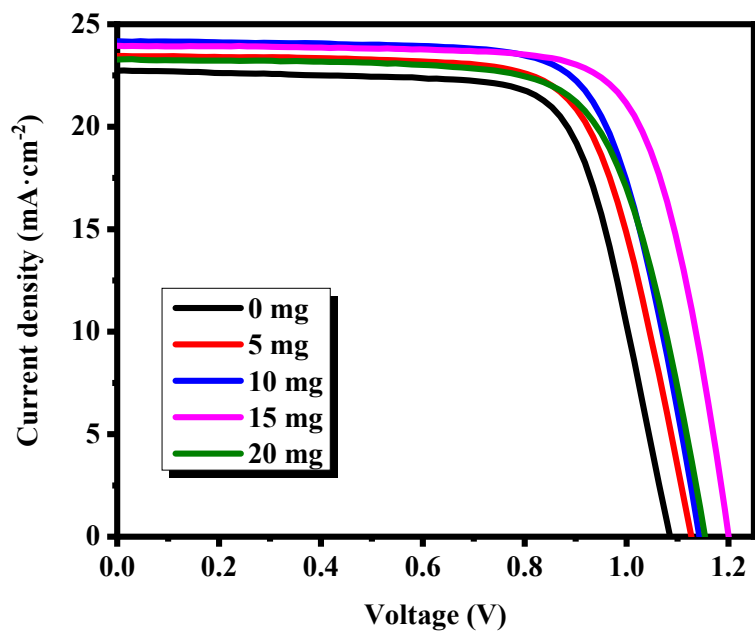

**Figure S1** J-V curves of different concentration

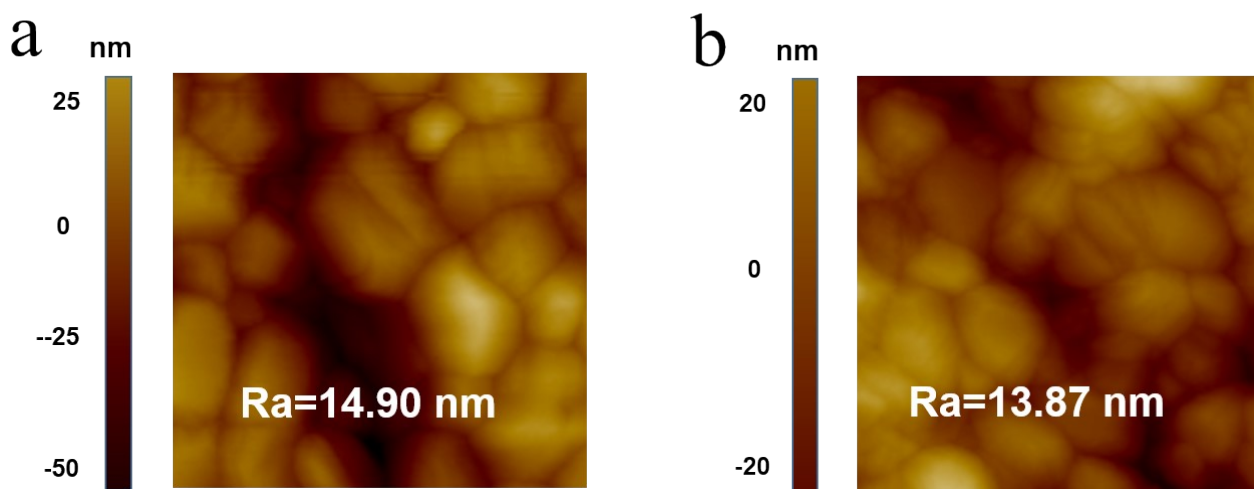

**Figure S2** (a) AFM images of the control perovskite film, (b) AFM images of the target perovskite film.

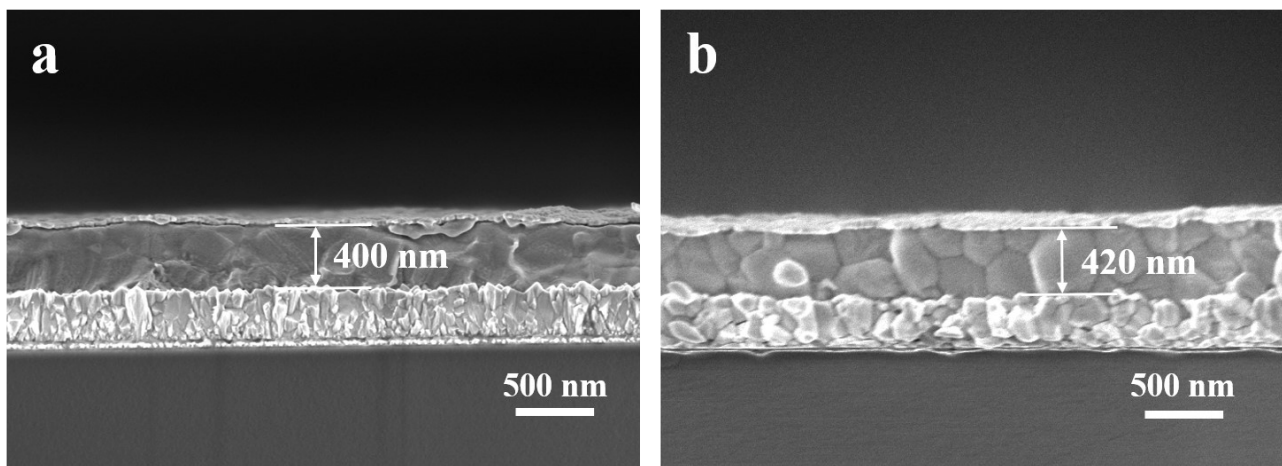

**Figure S3** Cross-sectional view FESEM images of PSCs assembled with (a) the control perovskite film and (b) the target perovskite film.

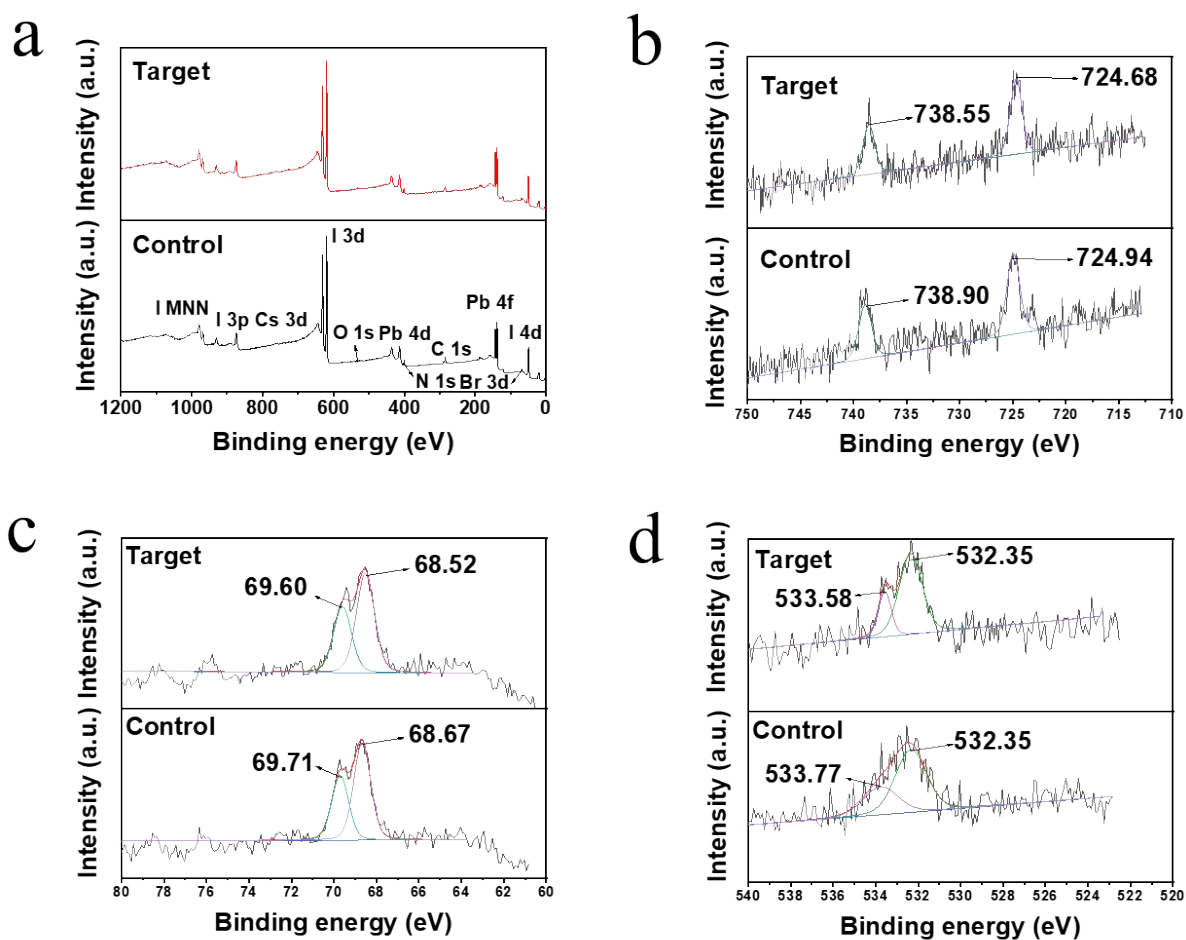

**Figure S4** (a) Survey spectra, (b) high resolution XPS spectra of Cs 3d, (c) high resolution XPS spectra of Br 3d, (d) high resolution XPS spectra of O 1s.

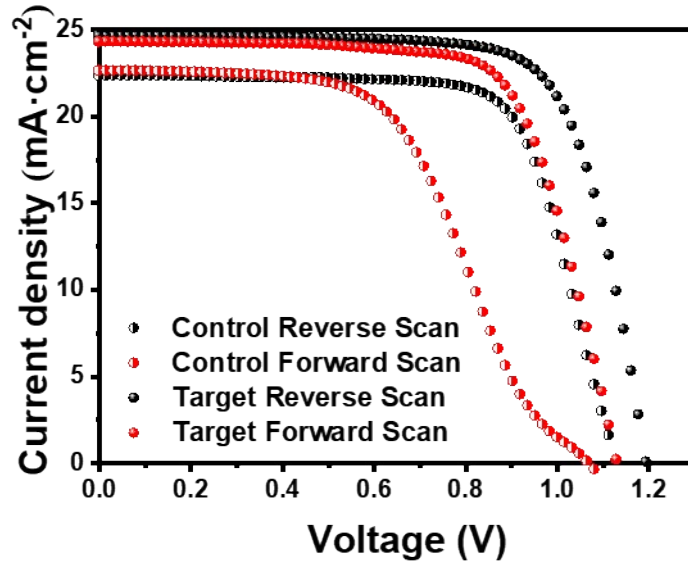

Figure S5 J-V curves in the forward and reverse scan of a random device.

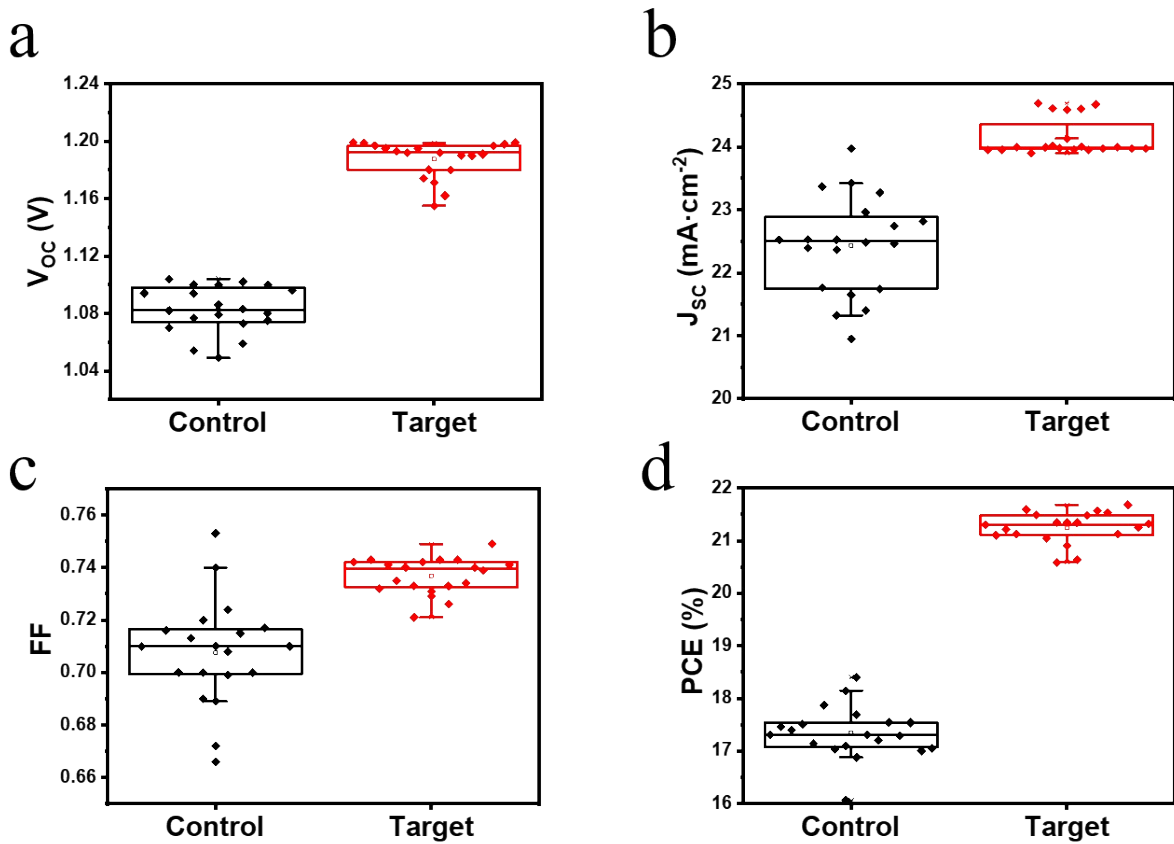

Figure S6 Box plots of the photovoltaic parameters for 50 independent PSCs fabricated under the same experimental conditions.

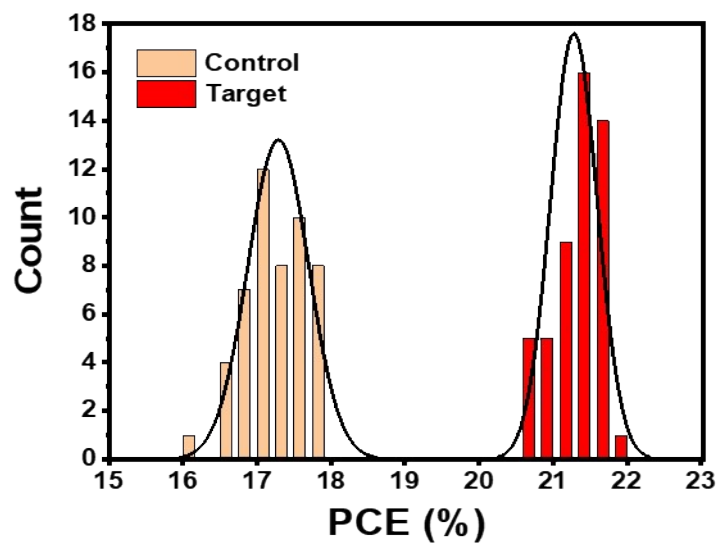

**Figure S7** PCE distribution of the control and target PSC devices.

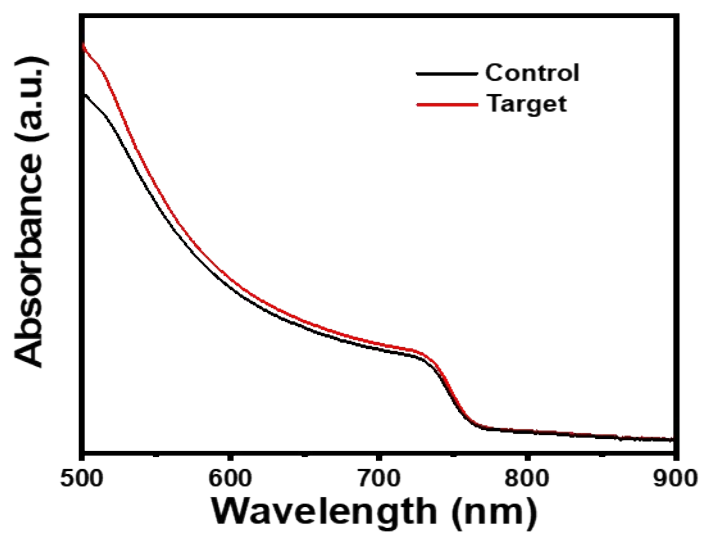

**Figure S8** UV-vis absorption spectra for the control and target perovskite films.

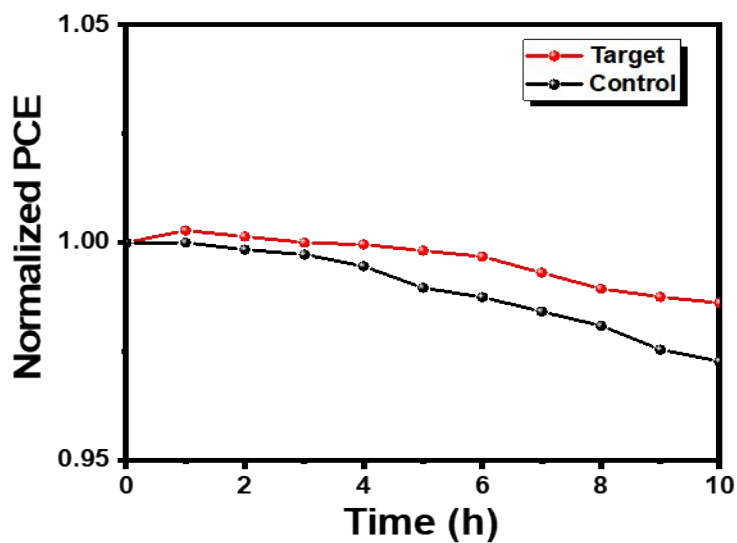

**Figure S9** Light stability tests of the devices without encapsulation under AM 1.5G illumination.

**Table S1** The performance parameters of a random device in the forward and reverse scan.

| Device         | Scan Direction | $V_{OC}$ (V) | $J_{SC}$ ( $\text{mA}\cdot\text{cm}^{-2}$ ) | FF    | PCE (%) |
|----------------|----------------|--------------|---------------------------------------------|-------|---------|
| <b>Control</b> | Reverse Scan   | 1.129        | 22.39                                       | 0.717 | 18.15   |
|                | Forward Scan   | 1.055        | 22.65                                       | 0.536 | 12.80   |
| <b>Target</b>  | Reverse Scan   | 1.209        | 23.95                                       | 0.749 | 21.68   |
|                | Forward Scan   | 1.129        | 24.32                                       | 0.707 | 19.42   |
